# Supplementary material for: Operando transmission electron microscopy of battery cycling: thickness dependent breaking of TiO2 coating on Si/SiO2 nanoparticles
Source: Royal Society of Chemistry journal article supplement (doi:10.1039/d1cc07172f), 2022-01-01
Supplement: d1cc07172f5.pdf [file d1cc07172f5.pdf]

## Supporting Information

### **Operando Transmission Electron Microscopy of Battery Cycling: Thickness-dependent Breaking of TiO<sub>2</sub> Coating on Si/SiO<sub>2</sub> Nanoparticles**

Shibabrata Basak<sup>\*, §, ‡, #</sup>, Amir H. Tavabi<sup>‡</sup>, Krzysztof Dzieciol<sup>§</sup>, Vadim Migunov<sup>‡</sup>, Violetta Arszelewska<sup>†</sup>, Hermann Tempel<sup>§</sup>, Hans Kungl<sup>§</sup>, Erik M. Kelder<sup>†</sup>, Marnix Wagemaker<sup>†</sup>, Chandramohan George<sup>#</sup>, Joachim Mayer<sup>‡, ∇</sup>, Rafal E. Dunin-Borkowski<sup>‡</sup>, Rüdiger-A. Eichel<sup>§, ⊥</sup>

<sup>§</sup>Institute of Energy and Climate Research, Fundamental Electrochemistry (IEK-9), Forschungszentrum Jülich GmbH, 52425 Jülich, Germany

<sup>‡</sup>Ernst Ruska-Centre for Microscopy and Spectroscopy with Electrons and Peter Grünberg Institute, Forschungszentrum Jülich GmbH, 52425 Jülich, Germany

<sup>†</sup>Department of Radiation Science and Technology, Delft University of Technology, Mekelweg 15, Delft, 2629JB, Netherlands

<sup>#</sup>Dyson School of Design Engineering, Imperial College London, SW7 2AZ, London, UK

<sup>∇</sup>Central Facility for Electron Microscopy GFE, RWTH Aachen University, Aachen, 52074, Germany

<sup>⊥</sup>Institute of Physical Chemistry, RWTH Aachen University, 52074 Aachen, Germany

\* Corresponding Author

Email id: [s.basak@fz-juelich.de](mailto:s.basak@fz-juelich.de)

**TiO<sub>2</sub> coating:** The coating of Si/SiO<sub>2</sub> particles with average particle size of 100 nm was performed via Atomic Layer Deposition by the Delft IMP. ALD was conducted in fluidised bed reactor at 150°C and atmospheric pressure. To coat Si with TiO<sub>2</sub>, titanium isopropoxide with water as a co-reactant were used. The carrier gas used to purge reactor chamber and remove by-products was nitrogen. The sequence of reaction was applied was 3-6-1-4 min for titanium isopropoxide-nitrogen-water-nitrogen, respectively which corresponds to 1 cycle. For the 5 nm and 10 nm of TiO<sub>2</sub> coating ~25 and ~125 cycles were used respectively.

**In-situ TEM experiments:** Half TEM copper grid with TiO<sub>2</sub> coated Si nanoparticles (NPs) and electro-polished tungsten needle with lithium/lithium oxide were mounted onto a Nanofactory TEM holder in an Ar glovebox and transferred to a FEI Titan G2 transmission electron microscope (TEM) operated at 300kV in an Ar-filled glove bag. In order to minimize the influence of the electron beam during the operando experiments, a low electron dose rate of below 10 e-/Å<sup>2</sup>/s was used for recording image sequences using a Gatan K2 IS direct electron detection camera. A negative voltage with respect to Li was applied to the TiO<sub>2</sub> coated Si nanoparticles (NPs) to lithiate NPs electrochemically, while positive voltage with respect to Li was applied to de-lithiate NPs.

**Electrode preparation for C-rate test:** The electrodes were prepared by slurry casting method. All the components, active material (crystalline Si powder, mean particle size distribution of 100 nm, 99% purity, Alfa Aesar), conductive additive (Super P, TIMCAL) and binder (carboxymethyl cellulose,  $M_w = 90,000$  g/mol, Sigma Aldrich) are mixed in an agate jars with 3 agate balls with weight ratio 0.6 : 0.2 : 0.2 at 250 rpm for 90 min. To mix the powders 2 ml of buffer solution (pH = 3, Fluka) was used. Mixed slurry was casted using doctor blade with wet thickness of  $\sim 100$   $\mu\text{m}$  on copper foil. Afterwards slurry was dried in air and under vacuum at  $60^\circ\text{C}$  for 12 h. Finally, electrodes were cut in circular shape with diameter 12.6 mm and cold-pressed under 2 t for 1 min. In order to avoid reactions with moisture and oxygen ( $< 2$  ppm  $\text{H}_2\text{O}$  and  $< 0.1$  ppm  $\text{O}_2$ ), coin-cells were assembled in the glove box. A polymer separator (Celgard 2250) with 10 drops of electrolyte 1.0 M  $\text{LiPF}_6$  in 1:1 v/v EC/DEC ( $< 15$  ppm  $\text{H}_2\text{O}$ , Sigma Aldrich) and Li metal as a counter electrode (Sigma-Aldrich), were used in cell assembly.

**Electrochemical test:** The C-rate test, was conducted using coin-cells within voltage 0.005 V to 1.5 V vs.  $\text{Li/Li}^+$  for the first cycle and 0.01 to 1.2 V vs.  $\text{Li/Li}^+$  for the next cycles. Cells were cycled in 0.1C, 0.2C, 0.5C, and again 0.1C for 5 cycles in each C-rate. Current was calculated based on the Si with the capacity of  $1500 \text{ mAhg}^{-1}$ .

### **X-ray diffraction**

A PANalytical X'Pert Pro PW3040/60 diffractometer with  $\text{Cu K}\alpha$  radiation operating at 45 kV and 40 mA in an angular  $2\theta$  range of  $10\text{--}100^\circ$  was used for XRD measurements.

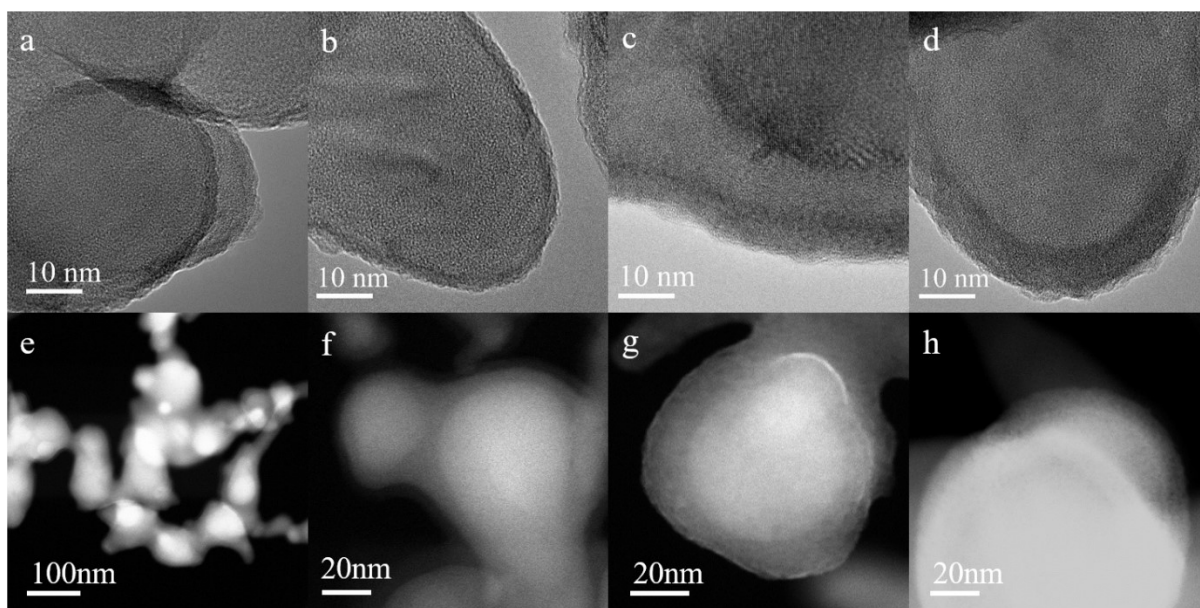

Figure S1. Si/SiO<sub>2</sub> particles with/without TiO<sub>2</sub> coating. (a-b) TEM images of the 5nm TiO<sub>2</sub> coated particles, (c-d) TEM images of the 10nm TiO<sub>2</sub> coated particles, (e-f) STEM images of the Si/SiO<sub>2</sub> particles without coating, (g) STEM images of the 5nm TiO<sub>2</sub> coated particles, and (h) STEM images of the 10nm TiO<sub>2</sub> coated particles.

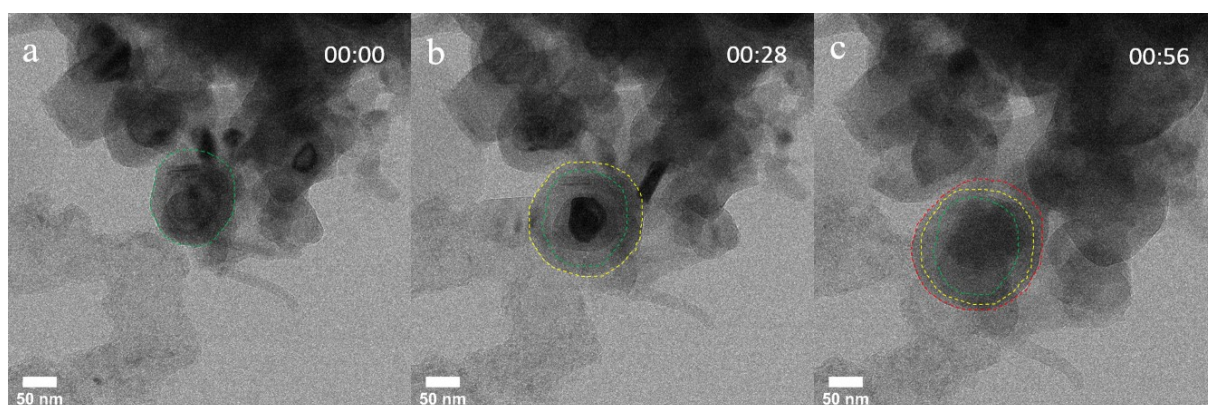

Figure S2. The gradual swelling of the 5nm TiO<sub>2</sub> coated Si/SiO<sub>2</sub> particle during first lithiation is highlighted using green, yellow and red dotted lines. For particle size estimation frames were first chosen from the corresponding dataset, then particle shapes were carefully inspected and traced using the ‘polygon selection’ tool of ImageJ.

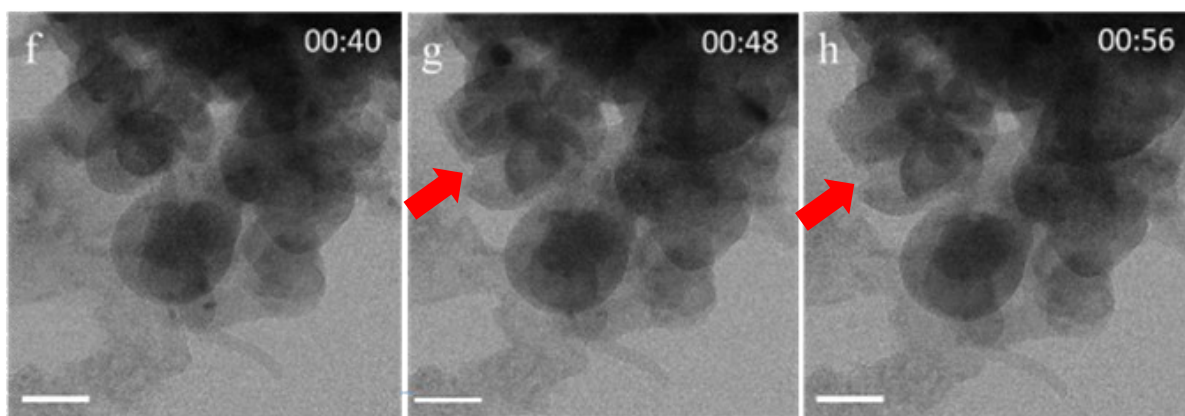

Figure S3. Arrow highlights the rare occurrence of particle breakage for 5nm  $\text{TiO}_2$  coated Si/SiO<sub>2</sub> particles (The images are from same dataset as in Figure 3 of the manuscript).

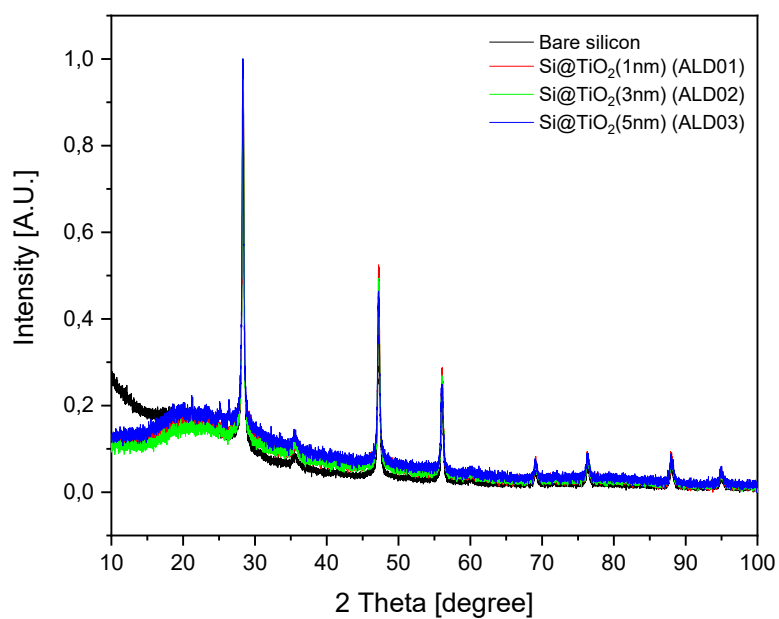

Figure S4. X-ray diffraction patterns of  $\text{TiO}_2$  coated Si/SiO<sub>2</sub> nanoparticles. No visible changes of diffraction peaks upon  $\text{TiO}_2$  coating refers to the amorphous nature of the  $\text{TiO}_2$  coatings.

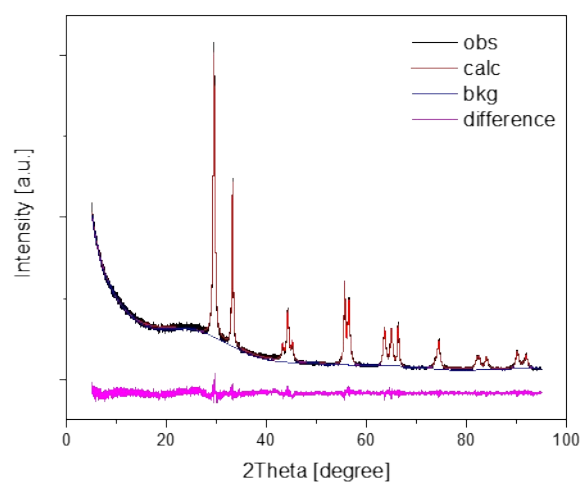

Figure S5. X-ray diffraction pattern shows sintering at 450°C for 5 hours in argon atmosphere transform the ALD deposited amorphous 10 nm TiO<sub>2</sub> coating to crystalline.

Movie S1: Shows lithiation-delithiation cycles of 5nm TiO<sub>2</sub> coated Si nanoparticles. The video plays at 24x speed.

Movie S2: Shows lithiation-delithiation cycles of 5nm TiO<sub>2</sub> coated another Si nanoparticles cluster. The video plays at 24x speed.

Movie S3: Shows lithiation-delithiation cycles of 10nm TiO<sub>2</sub> coated Si nanoparticles. The video plays at 24x speed.

Movie S4: Shows lithiation-delithiation cycles of 10nm TiO<sub>2</sub> coated another Si nanoparticles cluster. The video plays at 24x speed.
